# Supplementary material for: Socioeconomic position and adverse childhood experiences as risk factors for health-related behaviour change and employment adversity during the COVID-19 pandemic: insights from a prospective cohort study in the UK
Source: Springer Nature journal article supplement (doi:10.1186/s12889-022-14184-8), 2022-09-24
Supplement: MOESM1 [file 23534678]

## **Supplimentary figures and tables**

**Socioeconomic position and adverse childhood experiences as risk factors for health-related behavior change and employment adversity during the COVID-19 pandemic: insights from a prospective cohort study in the UK**

Smith et al.

**Supplementary Figure 1:** Flow chart of inclusion and exclusion of participants

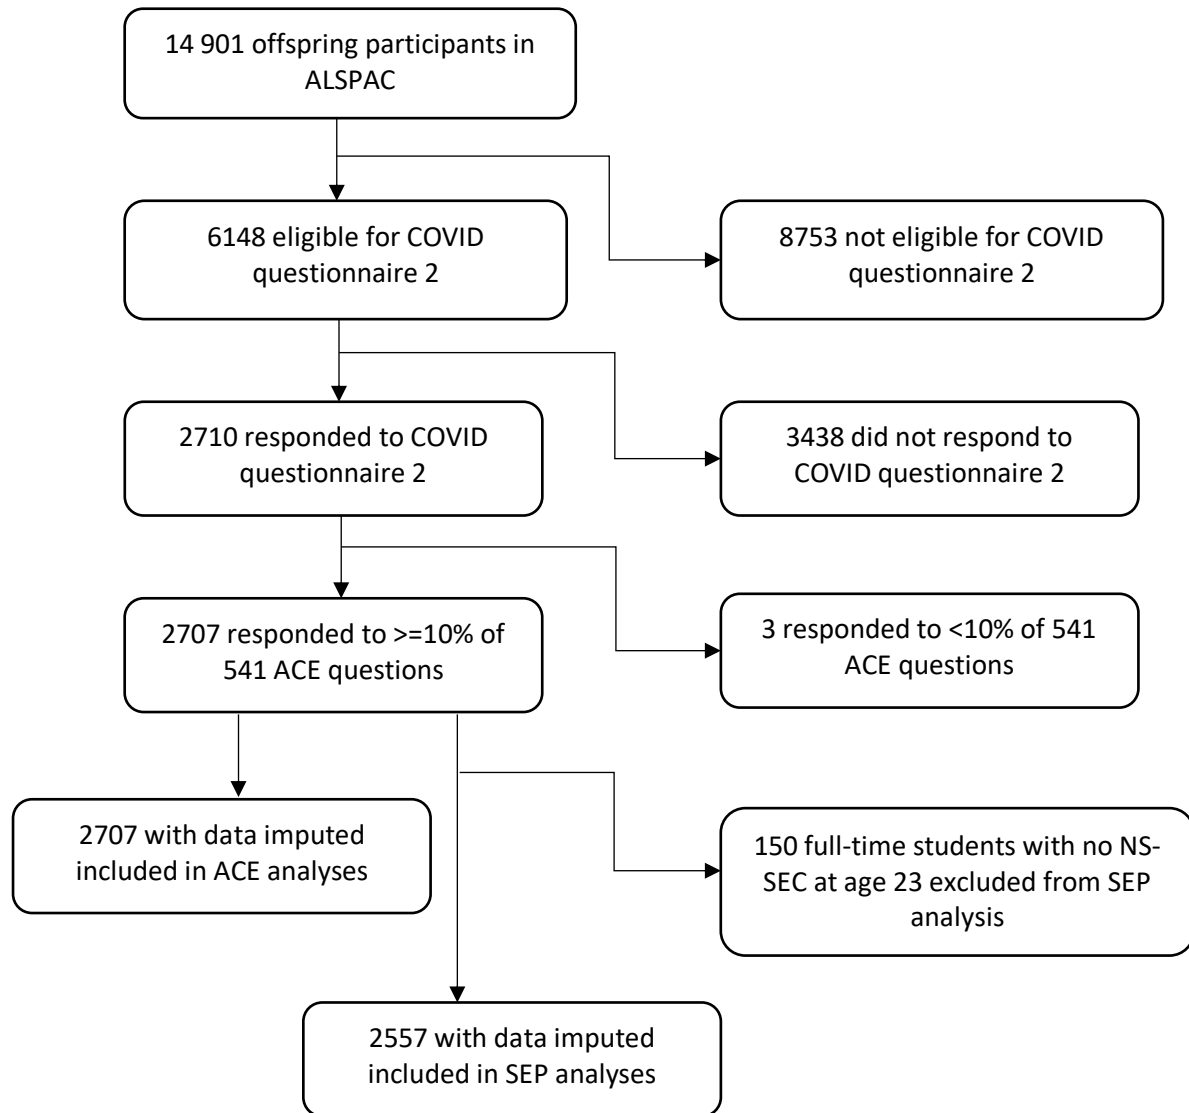

**Supplementary Table 1.** Recoding of 8-class NS-SEC variable to 4 classes as defined by the UK Office for National Statistics.

| 8 Class NS-SEC                                                    |            | 3 Class NS-SEC                                                    |             |
|-------------------------------------------------------------------|------------|-------------------------------------------------------------------|-------------|
| Category                                                          | n (%)      | Category                                                          | n (%)       |
| 1. Higher managerial, administrative and professional occupations | 313 (12.2) | 1. Higher managerial, administrative and professional occupations | 1126 (44.0) |
| 2. Lower managerial, administrative and professional occupations  | 817 (32.0) |                                                                   |             |
| 3. Intermediate occupations                                       | 586 (22.9) | 2. Intermediate occupations                                       | 616 (24.1)  |
| 4. Small employers and own account workers                        | 30 (1.2)   |                                                                   |             |
| 5. Lower supervisory and technical occupations                    | 94 (3.7)   | 3. Routine and manual occupations                                 | 579 (22.6)  |
| 6. Semi-routine occupations                                       | 321 (12.6) |                                                                   |             |
| 7. Routine occupations                                            | 160 (6.3)  |                                                                   |             |
| 8. Never worked and long-term unemployed                          | 236 (9.2)  | Never worked and long-term unemployed                             | 236 (9.2)   |

**Supplementary Table 2.** Characteristics of participants included in SEP analyses using data from multi-variate imputation. N=2557

| Variable                              | n (%)                                                                    |                                    |                                          |                                              |                                 |
|---------------------------------------|--------------------------------------------------------------------------|------------------------------------|------------------------------------------|----------------------------------------------|---------------------------------|
| <b>Sex</b>                            | <b>Female</b>                                                            |                                    | <b>Male</b>                              |                                              |                                 |
|                                       | 1815 (71.0)                                                              |                                    | 742 (29.0)                               |                                              |                                 |
| <b>Age (years)</b>                    | <b>27</b>                                                                | <b>28</b>                          | <b>29</b>                                |                                              |                                 |
|                                       | 827 (32.3)                                                               | 1479 (57.8)                        | 251 (9.8)                                |                                              |                                 |
| <b>Ethnicity</b>                      | <b>White</b>                                                             |                                    | <b>Non-white</b>                         |                                              |                                 |
|                                       | 2450 (95.8)                                                              |                                    | 107 (4.2)                                |                                              |                                 |
| <b>Socio-economic status (NS-SEC)</b> | <b>1. Higher managerial, administrative and professional occupations</b> | <b>2. Intermediate occupations</b> | <b>3. Routine and manual occupations</b> | <b>Never worked and long-term unemployed</b> |                                 |
|                                       | 1126 (44.0)                                                              | 616 (24.1)                         | 579 (22.6)                               | 236 (9.2)                                    |                                 |
| <b>Health-related behaviours</b>      | <b>Decreased</b>                                                         | <b>Stayed the same</b>             |                                          | <b>Increased</b>                             |                                 |
| Number of homecooked meals            | 92 (3.4)                                                                 | 860 (31.8)                         |                                          | 1605 (59.3)                                  |                                 |
| Number of meals                       | 262 (9.7)                                                                | 1827 (67.5)                        |                                          | 468 (17.3)                                   |                                 |
| Number of snacks                      | 347 (12.8)                                                               | 948 (35.0)                         |                                          | 1262 (46.6)                                  |                                 |
| Exercise quantity                     | 1030 (38.0)                                                              | 491 (18.1)                         |                                          | 1036 (38.3)                                  |                                 |
| Sleep quantity                        | 608 (22.5)                                                               | 1073 (39.6)                        |                                          | 876 (32.4)                                   |                                 |
|                                       | <b>Decreased</b>                                                         | <b>Stayed the same</b>             | <b>Increased</b>                         | <b>Non-drinker/non-smoker</b>                |                                 |
| Alcohol quantity                      | 428 (15.8)                                                               | 789 (29.1)                         | 987 (36.5)                               | 353 (13.0)                                   |                                 |
| Smoking/vaping quantity               | 99 (3.7)                                                                 | 273 (10.1)                         | 289 (10.7)                               | 1896 (70.0)                                  |                                 |
| <b>Financial/employment variables</b> |                                                                          |                                    |                                          |                                              |                                 |
| Change in employment status           | <b>Employed no change</b>                                                | <b>Employed reduced hours</b>      | <b>Furlough/paid leave/unpaid leave</b>  | <b>Stopped working during pandemic</b>       | <b>Not working pre-pandemic</b> |
|                                       | 1473 (54.4)                                                              | 252 (9.3)                          | 481 (17.8)                               | 166 (6.1)                                    | 185 (6.8)                       |
| Financial situation since pandemic    | <b>Worse off</b>                                                         |                                    | <b>Stayed the same</b>                   |                                              | <b>Better off</b>               |
|                                       | 664 (24.5)                                                               |                                    | 954 (35.2)                               |                                              | 939 (4.7)                       |
| Claimed benefits since pandemic       | 340 (12.6)                                                               |                                    |                                          |                                              |                                 |
| Mortgage/rent deferral since pandemic | 178 (6.6)                                                                |                                    |                                          |                                              |                                 |

**Supplementary Table 3.** Characteristics of participants that responded to COVID questionnaire 2, before imputation. N=2710. *Continued on next page.*

| Variable                               | n (%)                                                             |           |                             |            |                                   |           |                                       |          |             |
|----------------------------------------|-------------------------------------------------------------------|-----------|-----------------------------|------------|-----------------------------------|-----------|---------------------------------------|----------|-------------|
| Sex                                    | Female                                                            |           |                             | Male       |                                   |           |                                       |          | Missing     |
|                                        | 1912 (70.6)                                                       |           |                             | 795 (29.3) |                                   |           |                                       |          | 3 (0.1)     |
| Age (years)                            | 27                                                                |           | 28                          |            |                                   | 29        |                                       |          | Missing     |
|                                        | 888 (32.8)                                                        |           | 1557 (57.5)                 |            |                                   | 265 (9.8) |                                       |          | 0 (0.0)     |
| Ethnicity                              | White                                                             |           |                             | Non-white  |                                   |           |                                       |          | Missing     |
|                                        | 2326 (85.8)                                                       |           |                             | 81 (3.0)   |                                   |           |                                       |          | 303 (11.2)  |
| Obtained GCSE grades A*-C <sup>a</sup> | Yes                                                               |           |                             |            | No                                |           |                                       |          | Missing     |
|                                        | 1596 (58.9)                                                       |           |                             |            | 38 (1.4)                          |           |                                       |          | 1076 (39.7) |
| Monthly take-home pay (£) <sup>a</sup> | Not doing paid work                                               | 1-499     | 500-999                     | 1000-1499  | 1500-1999                         | 2000-2499 | 2500-2999                             | 3000+    | Missing     |
|                                        | 49 (1.8)                                                          | 102 (3.8) | 205 (7.6)                   | 693 (25.6) | 665 (24.5)                        | 210 (7.7) | 69 (2.5)                              | 41 (1.5) | 676 (24.9)  |
| ACE score                              | 0                                                                 |           | 1                           |            | 2-3                               |           | 4+                                    |          | Missing     |
|                                        | 341 (12.6)                                                        |           | 407 (15.0)                  |            | 517 (19.1)                        |           | 192 (7.1)                             |          | 1253 (46.2) |
| <b>ACEs</b>                            |                                                                   |           |                             |            |                                   |           |                                       |          | Missing     |
| Physical abuse                         | 401 (14.8)                                                        |           |                             |            |                                   |           |                                       |          | 649 (23.9)  |
| Sexual abuse                           | 111 (4.1)                                                         |           |                             |            |                                   |           |                                       |          | 349 (12.9)  |
| Emotional abuse                        | 411 (15.2)                                                        |           |                             |            |                                   |           |                                       |          | 649 (23.9)  |
| Emotional neglect                      | 368 (13.6)                                                        |           |                             |            |                                   |           |                                       |          | 680 (25.1)  |
| Bullying                               | 506 (18.7)                                                        |           |                             |            |                                   |           |                                       |          | 540 (19.9)  |
| Violence between parents               | 335 (12.4)                                                        |           |                             |            |                                   |           |                                       |          | 811 (29.9)  |
| Parental substance abuse               | 167 (6.3)                                                         |           |                             |            |                                   |           |                                       |          | 662 (24.4)  |
| Parental mental illness or suicide     | 873 (32.2)                                                        |           |                             |            |                                   |           |                                       |          | 606 (22.4)  |
| Parental criminal conviction           | 138 (5.1)                                                         |           |                             |            |                                   |           |                                       |          | 616 (22.7)  |
| Parental separation                    | 469 (17.3)                                                        |           |                             |            |                                   |           |                                       |          | 758 (28.0)  |
| Socio-economic status (NS-SEC)         | 1. Higher managerial, administrative and professional occupations |           | 2. Intermediate occupations |            | 3. Routine and manual occupations |           | Never worked and long-term unemployed |          | Missing     |
|                                        | 855 (31.5)                                                        |           | 471 (17.4)                  |            | 437 (16.1)                        |           | 163 (6.0)                             |          | 784 (28.9)  |
| Health-related behaviours              | Decreased                                                         |           | Stayed the same             |            |                                   | Increased |                                       | Missing  |             |

|                                       |                           |                               |                                         |                                        |                                 |                |
|---------------------------------------|---------------------------|-------------------------------|-----------------------------------------|----------------------------------------|---------------------------------|----------------|
| Number of homecooked meals            | 96 (3.5)                  | 885 (32.7)                    | 1654 (61.0)                             | 75 (2.8)                               |                                 |                |
| Number of meals                       | 264 (9.7)                 | 1904 (70.3)                   | 469 (17.3)                              | 73 (2.7)                               |                                 |                |
| Number of snacks                      | 346 (12.8)                | 992 (36.6)                    | 1293 (47.7)                             | 79 (2.9)                               |                                 |                |
| Exercise quantity                     | 1058 (39.0)               | 508 (18.7)                    | 1071 (39.5)                             | 73 (2.7)                               |                                 |                |
| Sleep quantity                        | 910 (33.6)                | 1112 (41.0)                   | 910 (33.6)                              | 76 (2.8)                               |                                 |                |
|                                       | <b>Decreased</b>          | <b>Stayed the same</b>        | <b>Increased</b>                        | <b>Non-drinker/non-smoker</b>          | <b>Missing</b>                  |                |
| Alcohol quantity                      | 449 (16.6)                | 812 (30.0)                    | 1021 (37.7)                             | 357 (13.2)                             | 71 (2.6)                        |                |
| Smoking/vaping quantity               | 101 (3.7)                 | 279 (10.3)                    | 286 (10.6)                              | 1971 (72.7)                            | 73 (2.7)                        |                |
| <b>Financial/employment variables</b> |                           |                               |                                         |                                        |                                 |                |
| Change in employment status           | <b>Employed no change</b> | <b>Employed reduced hours</b> | <b>Furlough/paid leave/unpaid leave</b> | <b>Stopped working during pandemic</b> | <b>Not working pre-pandemic</b> | <b>Missing</b> |
|                                       | 1506 (55.6)               | 247 (9.1)                     | 460 (17.0)                              | 158 (5.8)                              | 184 (6.8)                       | 155 (5.7)6     |
| Financial situation since pandemic    | <b>Worse off</b>          |                               | <b>Stayed the same</b>                  |                                        | <b>Better off</b>               | <b>Missing</b> |
|                                       | 639 (23.6)                |                               | 968 (35.7)                              |                                        | 969 (35.8)                      | 134 (4.9)      |
| Claimed benefits since pandemic       | <b>Yes</b>                |                               |                                         | <b>No</b>                              |                                 | <b>Missing</b> |
|                                       | 306 (11.3)                |                               |                                         | 2250 (83.0)                            |                                 | 154 (5.7)      |
| Mortgage/rent deferral since pandemic | <b>Yes</b>                |                               |                                         | <b>No</b>                              |                                 | <b>Missing</b> |
|                                       | 167 (6.2)                 |                               |                                         | 2413 (89.0)                            |                                 | 130 (4.8)      |

<sup>a</sup>Details on the data collection for these additional demographic variables are in Additional File 2.

**Supplementary Table 4.** Maternal education for excluded participants and participants included in analyses.

|                                                 | <b>Participants (%)</b> |                 |
|-------------------------------------------------|-------------------------|-----------------|
|                                                 | <b>Excluded</b>         | <b>Included</b> |
|                                                 | N=12911                 | N=2710          |
| <b>Mother's highest education qualification</b> |                         |                 |
| CSE                                             | 13.6                    | 8.2             |
| Vocational                                      | 7.0                     | 6.2             |
| O level                                         | 24.3                    | 30.3            |
| A level                                         | 14.9                    | 25.1            |
| Degree                                          | 7.6                     | 20.1            |
| Not available                                   | 32.6                    | 10.1            |

**Supplementary Table 5:** Association between social class and changes in health-related behaviour during the March-July 2020 lockdown (adjusted for ethnicity, age at time of questionnaire, home ownership, maternal and partner education, parity, maternal age and maternal marital status). N=2557

|                                    | <b>NS-SEC social class at age 23 years</b>                            |                                 |                                       |                                              |
|------------------------------------|-----------------------------------------------------------------------|---------------------------------|---------------------------------------|----------------------------------------------|
|                                    | <b>Higher managerial, administrative and professional occupations</b> | <b>Intermediate occupations</b> | <b>Routine and manual occupations</b> | <b>Never worked and long-term unemployed</b> |
|                                    | <b>N=1126</b>                                                         | <b>N=616</b>                    | <b>N=579</b>                          | <b>N=236</b>                                 |
| <b>Number of home-cooked meals</b> |                                                                       |                                 |                                       |                                              |
| Decreased                          | ref                                                                   | 0.79(0.42-1.47)                 | 0.63(0.31-1.28)                       | 0.58(0.21-1.57)                              |
| Stayed the same                    | ref                                                                   | ref                             | ref                                   | ref                                          |
| Increased                          | ref                                                                   | 0.97(0.76-1.25)                 | 0.77(0.59-1.00)                       | 0.72(0.51-1.04)                              |
| <b>Number of meals</b>             |                                                                       |                                 |                                       |                                              |
| Decreased                          | ref                                                                   | 1.03(0.69-1.54)                 | 1.41(0.95-2.09)                       | 1.22(0.67-2.23)                              |
| Stayed the same                    | ref                                                                   | ref                             | ref                                   | ref                                          |
| Increased                          | ref                                                                   | 0.91(0.67-1.24)                 | 1.13(0.83-1.55)                       | 1.26(0.81-1.97)                              |
| <b>Number of snacks</b>            |                                                                       |                                 |                                       |                                              |
| Decreased                          | ref                                                                   | 1.23(0.86-1.76)                 | 1.09(0.73-1.62)                       | 0.85(0.45-1.59)                              |
| Stayed the same                    | ref                                                                   | ref                             | ref                                   | ref                                          |
| Increased                          | ref                                                                   | 1.02(0.80-1.31)                 | 1.02(0.80-1.31)                       | 0.99(0.69-1.43)                              |
| <b>Exercise quantity</b>           |                                                                       |                                 |                                       |                                              |
| Decreased                          | ref                                                                   | 1.08(0.77-1.50)                 | 1.02(0.73-1.42)                       | 0.83(0.52-1.33)                              |
| Stayed the same                    | ref                                                                   | ref                             | ref                                   | ref                                          |
| Increased                          | ref                                                                   | 1.11(0.81-1.52)                 | 0.99(0.72-1.37)                       | 0.78(0.50-1.23)                              |
| <b>Sleep quantity</b>              |                                                                       |                                 |                                       |                                              |
| Decreased                          | ref                                                                   | 1.16(0.86-1.55)                 | 1.26(0.93-1.70)                       | 1.41(0.92-2.16)                              |
| Stayed the same                    | ref                                                                   | ref                             | ref                                   | ref                                          |
| Increased                          | ref                                                                   | 1.12(0.87-1.44)                 | 0.99(0.75-1.30)                       | 1.11(0.73-1.67)                              |
| <b>Alcohol quantity</b>            |                                                                       |                                 |                                       |                                              |
| Decreased                          | ref                                                                   | 1.09(0.78-1.52)                 | 1.00(0.68-1.47)                       | 1.02(0.61-1.72)                              |
| Stayed the same                    | ref                                                                   | ref                             | ref                                   | ref                                          |
| Increased                          | ref                                                                   | 1.08(0.82-1.42)                 | 1.08(0.82-1.42)                       | 0.74(0.48-1.16)                              |
| Non-drinker                        | ref                                                                   | 1.08(0.74-1.59)                 | 1.36(0.92-2.02)                       | 1.42(0.83-2.44)                              |
| <b>Smoking/vaping quantity</b>     |                                                                       |                                 |                                       |                                              |
| Decreased                          | ref                                                                   | 1.39(0.68-2.84)                 | 1.11(0.53-2.35)                       | 1.68(0.7-4.04)                               |
| Stayed the same                    | ref                                                                   | ref                             | ref                                   | ref                                          |
| Increased                          | ref                                                                   | 0.97(0.57-1.65)                 | 0.86(0.53-1.41)                       | 0.93(0.47-1.82)                              |
| Non-smoker                         | ref                                                                   | 0.89(0.59-1.34)                 | 0.58(0.40-0.86)                       | 0.48(0.29-0.79)                              |



**Supplementary Table 6:** Association between Adverse Childhood Experiences score and changes in health-related behaviour during the March-July 2020 lockdown (adjusted for ethnicity, age at time of questionnaire, home ownership, maternal and partner education, parity, maternal age and maternal marital status). N=2707

|                                    | <b>Number of Adverse Childhood Experiences between 0-16 years</b> |                 |                 |                  |
|------------------------------------|-------------------------------------------------------------------|-----------------|-----------------|------------------|
|                                    | <b>0</b>                                                          | <b>1</b>        | <b>2-3</b>      | <b>4 or more</b> |
|                                    | <b>N=504</b>                                                      | <b>N=679</b>    | <b>N=980</b>    | <b>N=544</b>     |
| <b>Number of home-cooked meals</b> |                                                                   |                 |                 |                  |
| Decreased                          | ref                                                               | 1.15(0.55-2.41) | 1.25(0.63-2.50) | 1.44(0.64-3.24)  |
| Stayed the same                    | ref                                                               | ref             | ref             | ref              |
| Increased                          | ref                                                               | 0.99(0.74-1.31) | 1.16(0.89-1.51) | 0.87(0.64-1.19)  |
| <b>Number of meals</b>             |                                                                   |                 |                 |                  |
| Decreased                          | ref                                                               | 1.21(0.72-2.04) | 1.59(1.01-2.51) | 1.90(1.12-3.23)  |
| Stayed the same                    | ref                                                               | ref             | ref             | ref              |
| Increased                          | ref                                                               | 1.34(0.92-1.95) | 1.35(0.95-1.91) | 1.61(1.07-2.41)  |
| <b>Number of snacks</b>            |                                                                   |                 |                 |                  |
| Decreased                          | ref                                                               | 1.10(0.73-1.64) | 1.17(0.80-1.72) | 1.21(0.76-1.91)  |
| Stayed the same                    | ref                                                               | ref             | ref             | ref              |
| Increased                          | ref                                                               | 1.02(0.77-1.36) | 1.08(0.84-1.40) | 1.06(0.76-1.47)  |
| <b>Exercise quantity</b>           |                                                                   |                 |                 |                  |
| Decreased                          | ref                                                               | 1.02(0.71-1.48) | 0.99(0.70-1.40) | 1.08(0.71-1.65)  |
| Stayed the same                    | ref                                                               | ref             | ref             | ref              |
| Increased                          | ref                                                               | 0.96(0.67-1.39) | 0.98(0.71-1.36) | 1.06(0.70-1.63)  |
| <b>Sleep quantity</b>              |                                                                   |                 |                 |                  |
| Decreased                          | ref                                                               | 1.00(0.70-1.43) | 1.08(0.77-1.50) | 1.39(0.94-2.06)  |
| Stayed the same                    | ref                                                               | ref             | ref             | ref              |
| Increased                          | ref                                                               | 0.97(0.72-1.32) | 1.06(0.80-1.41) | 1.06(0.75-1.52)  |
| <b>Alcohol quantity</b>            |                                                                   |                 |                 |                  |
| Decreased                          | ref                                                               | 0.98(0.66-1.45) | 0.90(0.62-1.30) | 1.39(0.89-2.16)  |
| Stayed the same                    | ref                                                               | ref             | ref             | ref              |
| Increased                          | ref                                                               | 0.98(0.71-1.34) | 1.08(0.80-1.46) | 1.34(0.92-1.96)  |
| Non-drinker                        | ref                                                               | 0.81(0.52-1.24) | 0.88(0.59-1.32) | 1.55(0.95-2.53)  |
| <b>Smoking/vaping quantity</b>     |                                                                   |                 |                 |                  |
| Decreased                          | ref                                                               | 1.05(0.45-2.48) | 0.99(0.47-2.10) | 1.00(0.41-2.45)  |
| Stayed the same                    | ref                                                               | ref             | ref             | ref              |
| Increased                          | ref                                                               | 1.35(0.68-2.68) | 1.18(0.65-2.14) | 1.82(0.94-3.51)  |
| Non-smoker                         | ref                                                               | 0.99(0.61-1.60) | 0.67(0.44-1.00) | 0.63(0.38-1.04)  |

**Supplementary Table 7:** Association between individual Adverse Childhood Experiences and changes in health-related behaviour during the March-July 2020 lockdown (unadjusted). N=2707

|                                    | Adverse Childhood Experience |                 |                 |                   |                 |                          |                          |                                    |                              |                     |
|------------------------------------|------------------------------|-----------------|-----------------|-------------------|-----------------|--------------------------|--------------------------|------------------------------------|------------------------------|---------------------|
|                                    | Physical abuse               | Sexual abuse    | Emotional abuse | Emotional neglect | Bullying        | Violence between parents | Parental substance abuse | Parental mental illness or suicide | Parental criminal conviction | Parental separation |
|                                    | N=622                        | N=163           | N=659           | N=529             | N=646           | N=604                    | N=330                    | N=1183                             | N=280                        | N=780               |
| <b>Number of home-cooked meals</b> |                              |                 |                 |                   |                 |                          |                          |                                    |                              |                     |
| Decreased                          | 1.12(0.63-1.98)              | 1.45(0.61-3.45) | 1.22(0.71-2.08) | 1.61(0.93-2.77)   | 1.31(0.80-2.16) | 1.57(0.91-2.71)          | 1.23(0.57-2.66)          | 1.03(0.65-1.63)                    | 1.36(0.62-2.99)              | 0.70(0.40-1.24)     |
| Stayed the same                    | ref                          | ref             | ref             | ref               | ref             | ref                      | ref                      | ref                                | ref                          | ref                 |
| Increased                          | 0.97(0.78-1.20)              | 0.95(0.63-1.42) | 0.93(0.75-1.14) | 0.76(0.60-0.98)   | 0.95(0.77-1.17) | 0.95(0.75-1.19)          | 1.09(0.80-1.47)          | 0.97(0.81-1.15)                    | 0.96(0.68-1.36)              | 0.84(0.68-1.03)     |
| <b>Number of meals</b>             |                              |                 |                 |                   |                 |                          |                          |                                    |                              |                     |
| Decreased                          | 1.57(1.12-2.21)              | 1.69(0.97-2.92) | 1.13(0.79-1.63) | 1.64(1.17-2.31)   | 1.44(1.05-1.97) | 1.42(0.99-2.05)          | 1.47(0.95-2.30)          | 1.41(1.05-1.89)                    | 1.40(0.85-2.3)               | 1.24(0.89-1.73)     |
| Stayed the same                    | ref                          | ref             | ref             | ref               | ref             | ref                      | ref                      | ref                                | ref                          | ref                 |
| Increased                          | 1.37(1.05-1.81)              | 1.43(0.91-2.25) | 1.43(1.11-1.84) | 1.18(0.88-1.58)   | 1.31(1.02-1.68) | 1.47(1.10-1.95)          | 1.21(0.84-1.76)          | 1.14(0.91-1.43)                    | 0.96(0.61-1.51)              | 1.31(1.00-1.71)     |
| <b>Number of snacks</b>            |                              |                 |                 |                   |                 |                          |                          |                                    |                              |                     |
| Decreased                          | 0.98(0.71-1.34)              | 1.48(0.88-2.50) | 1.03(0.73-1.44) | 1.01(0.71-1.44)   | 0.96(0.70-1.32) | 1.10(0.76-1.58)          | 1.57(1.02-2.42)          | 1.19(0.90-1.56)                    | 1.51(0.95-2.39)              | 0.98(0.70-1.36)     |

|                          |                 |                 |                 |                 |                 |                 |                 |                 |                 |                 |
|--------------------------|-----------------|-----------------|-----------------|-----------------|-----------------|-----------------|-----------------|-----------------|-----------------|-----------------|
| Stayed the same          | ref             | ref             | ref             | ref             | ref             | ref             | ref             | ref             | ref             | ref             |
| Increased                | 0.94(0.74-1.20) | 1.04(0.70-1.54) | 1.01(0.81-1.26) | 1.02(0.81-1.29) | 1.11(0.90-1.38) | 1.22(0.96-1.56) | 1.29(0.95-1.74) | 1.11(0.91-1.34) | 0.96(0.66-1.40) | 1.27(1.02-1.58) |
| <b>Exercise quantity</b> |                 |                 |                 |                 |                 |                 |                 |                 |                 |                 |
| Decreased                | 0.91(0.69-1.22) | 1.17(0.68-2.01) | 1.16(0.88-1.54) | 1.02(0.76-1.36) | 1.07(0.80-1.41) | 1.35(0.98-1.86) | 1.30(0.86-1.96) | 0.96(0.76-1.22) | 0.80(0.51-1.25) | 0.98(0.73-1.30) |
| Stayed the same          | ref             | ref             | ref             | ref             | ref             | ref             | ref             | ref             | ref             | ref             |
| Increased                | 0.82(0.62-1.09) | 1.28(0.76-2.16) | 1.05(0.79-1.39) | 0.76(0.56-1.04) | 0.98(0.74-1.30) | 1.28(0.93-1.76) | 1.25(0.84-1.85) | 1.09(0.86-1.37) | 1.11(0.73-1.68) | 0.89(0.68-1.18) |
| <b>Sleep quantity</b>    |                 |                 |                 |                 |                 |                 |                 |                 |                 |                 |
| Decreased                | 1.38(1.07-1.78) | 1.48(0.94-2.32) | 1.44(1.09-1.90) | 1.00(0.77-1.32) | 1.24(0.96-1.59) | 1.38(1.04-1.84) | 1.19(0.79-1.78) | 1.24(0.99-1.54) | 1.16(0.77-1.75) | 1.03(0.79-1.35) |
| Stayed the same          | ref             | ref             | ref             | ref             | ref             | ref             | ref             | ref             | ref             | ref             |
| Increased                | 1.03(0.81-1.32) | 1.30(0.84-2.02) | 1.12(0.88-1.41) | 0.83(0.64-1.06) | 0.96(0.76-1.20) | 1.08(0.83-1.39) | 1.18(0.86-1.62) | 1.07(0.88-1.30) | 1.06(0.72-1.55) | 0.79(0.63-1.00) |
| <b>Alcohol quantity</b>  |                 |                 |                 |                 |                 |                 |                 |                 |                 |                 |
| Decreased                | 1.41(1.02-1.95) | 0.99(0.56-1.75) | 1.08(0.79-1.49) | 1.11(0.79-1.57) | 0.95(0.71-1.27) | 1.65(1.19-2.28) | 1.36(0.89-2.09) | 0.96(0.74-1.23) | 1.18(0.74-1.90) | 0.96(0.70-1.31) |
| Stayed the same          | ref             | ref             | ref             | ref             | ref             | ref             | ref             | ref             | ref             | ref             |
| Increased                | 1.37(1.06-1.78) | 0.99(0.63-1.55) | 1.22(0.95-1.58) | 1.00(0.76-1.31) | 0.87(0.68-1.10) | 1.36(1.04-1.80) | 1.26(0.88-1.81) | 1.02(0.83-1.26) | 0.97(0.65-1.44) | 0.99(0.79-1.26) |
| Non-drinker              | 2.13(1.53-2.97) | 1.71(1.02-2.88) | 1.70(1.21-2.40) | 1.59(1.10-2.30) | 1.03(0.75-1.43) | 1.41(0.96-2.06) | 1.32(0.81-2.16) | 0.97(0.72-1.31) | 1.11(0.65-1.89) | 1.37(0.98-1.90) |

|                                |                 |                 |                 |                 |                 |                 |                 |                 |                 |                 |
|--------------------------------|-----------------|-----------------|-----------------|-----------------|-----------------|-----------------|-----------------|-----------------|-----------------|-----------------|
| <b>Smoking/vaping quantity</b> |                 |                 |                 |                 |                 |                 |                 |                 |                 |                 |
| Decreased                      | 0.50(0.25-1.01) | 0.50(0.13-1.86) | 0.81(0.44-1.48) | 1.23(0.69-2.21) | 1.40(0.83-2.35) | 1.35(0.72-2.54) | 1.00(0.49-2.01) | 0.98(0.59-1.61) | 0.84(0.38-1.90) | 0.72(0.40-1.30) |
| Stayed the same                | ref             | ref             | ref             | ref             | ref             | ref             | ref             | ref             | ref             | ref             |
| Increased                      | 1.10(0.72-1.68) | 1.05(0.52-2.12) | 1.17(0.78-1.76) | 0.97(0.62-1.53) | 1.16(0.78-1.74) | 1.97(1.25-3.11) | 1.36(0.82-2.26) | 1.15(0.78-1.69) | 0.85(0.45-1.59) | 1.28(0.85-1.92) |
| Non-smoker                     | 0.66(0.48-0.91) | 0.72(0.42-1.25) | 0.76(0.54-1.06) | 0.75(0.53-1.06) | 0.79(0.58-1.09) | 1.04(0.72-1.51) | 0.67(0.44-1.03) | 0.81(0.60-1.09) | 0.58(0.36-0.91) | 0.65(0.47-0.90) |



|                          |                 |                 |                 |                 |                 |                 |                 |                 |                 |                 |
|--------------------------|-----------------|-----------------|-----------------|-----------------|-----------------|-----------------|-----------------|-----------------|-----------------|-----------------|
| Decreased                | 0.93(0.67-1.29) | 1.48(0.85-2.56) | 0.99(0.69-1.41) | 1.02(0.70-1.48) | 0.95(0.68-1.31) | 1.06(0.72-1.57) | 1.47(0.90-2.39) | 1.20(0.90-1.59) | 1.46(0.89-2.38) | 0.97(0.68-1.40) |
| Stayed the same          | ref             | ref             | ref             | ref             | ref             | ref             | ref             | ref             | ref             | ref             |
| Increased                | 0.88(0.69-1.12) | 0.95(0.63-1.44) | 0.94(0.75-1.20) | 0.96(0.75-1.23) | 1.10(0.88-1.38) | 1.13(0.87-1.46) | 1.15(0.83-1.59) | 1.06(0.87-1.29) | 0.88(0.59-1.31) | 1.14(0.90-1.45) |
| <b>Exercise quantity</b> |                 |                 |                 |                 |                 |                 |                 |                 |                 |                 |
| Decreased                | 0.90(0.66-1.22) | 1.06(0.60-1.88) | 1.14(0.84-1.54) | 1.01(0.74-1.37) | 1.07(0.80-1.43) | 1.41(1.00-2.00) | 1.36(0.85-2.17) | 0.94(0.73-1.21) | 0.75(0.46-1.21) | 0.97(0.70-1.33) |
| Stayed the same          | ref             | ref             | ref             | ref             | ref             | ref             | ref             | ref             | ref             | ref             |
| Increased                | 0.83(0.62-1.12) | 1.28(0.75-2.21) | 1.06(0.79-1.42) | 0.76(0.55-1.04) | 0.97(0.73-1.30) | 1.40(1.00-1.97) | 1.43(0.91-2.23) | 1.11(0.87-1.42) | 1.15(0.73-1.79) | 0.96(0.71-1.30) |
| <b>Sleep quantity</b>    |                 |                 |                 |                 |                 |                 |                 |                 |                 |                 |
| Decreased                | 1.28(0.99-1.67) | 1.33(0.83-2.12) | 1.39(1.05-1.86) | 0.95(0.71-1.27) | 1.21(0.94-1.56) | 1.35(0.99-1.83) | 1.09(0.68-1.75) | 1.16(0.92-1.46) | 1.05(0.67-1.63) | 0.94(0.71-1.26) |
| Stayed the same          | ref             | ref             | ref             | ref             | ref             | ref             | ref             | ref             | ref             | ref             |
| Increased                | 1.07(0.83-1.38) | 1.40(0.89-2.22) | 1.17(0.91-1.50) | 0.83(0.64-1.08) | 0.95(0.75-1.20) | 1.12(0.85-1.47) | 1.24(0.87-1.77) | 1.12(0.92-1.38) | 1.07(0.72-1.59) | 0.84(0.65-1.09) |
| <b>Alcohol quantity</b>  |                 |                 |                 |                 |                 |                 |                 |                 |                 |                 |
| Decreased                | 1.42(1.02-1.98) | 0.96(0.53-1.73) | 1.04(0.75-1.46) | 1.13(0.79-1.62) | 0.92(0.68-1.25) | 1.73(1.22-2.44) | 1.34(0.83-2.18) | 0.96(0.74-1.25) | 1.15(0.70-1.88) | 1.05(0.74-1.47) |
| Stayed the same          | ref             | ref             | ref             | ref             | ref             | ref             | ref             | ref             | ref             | ref             |
| Increased                | 1.40(1.07-1.84) | 1.01(0.63-1.62) | 1.29(0.99-1.68) | 1.01(0.76-1.33) | 0.87(0.68-1.11) | 1.39(1.04-1.87) | 1.36(0.92-2.02) | 1.02(0.82-1.26) | 0.99(0.65-1.50) | 1.01(0.78-1.32) |

|                                |                 |                 |                 |                 |                 |                 |                 |                 |                 |                 |
|--------------------------------|-----------------|-----------------|-----------------|-----------------|-----------------|-----------------|-----------------|-----------------|-----------------|-----------------|
| Non-drinker                    | 1.95(1.38-2.77) | 1.48(0.85-2.57) | 1.59(1.10-2.3)  | 1.38(0.94-2.03) | 0.98(0.70-1.37) | 1.28(0.85-1.93) | 1.06(0.60-1.89) | 0.84(0.61-1.14) | 0.96(0.53-1.71) | 1.20(0.83-1.73) |
| <b>Smoking/vaping quantity</b> |                 |                 |                 |                 |                 |                 |                 |                 |                 |                 |
| Decreased                      | 0.52(0.25-1.09) | 0.52(0.14-1.97) | 0.77(0.40-1.47) | 1.43(0.76-2.67) | 1.40(0.81-2.41) | 1.45(0.74-2.84) | 1.06(0.47-2.36) | 0.99(0.59-1.67) | 0.97(0.41-2.31) | 0.76(0.39-1.46) |
| Stayed the same                | ref             | ref             | ref             | ref             | ref             | ref             | ref             | ref             | ref             | ref             |
| Increased                      | 1.04(0.67-1.62) | 0.97(0.46-2.03) | 1.13(0.73-1.73) | 1.00(0.62-1.61) | 1.20(0.79-1.82) | 2.04(1.25-3.31) | 1.33(0.74-2.39) | 1.08(0.72-1.61) | 0.85(0.44-1.65) | 1.26(0.80-1.99) |
| Non-smoker                     | 0.70(0.50-0.99) | 0.76(0.43-1.35) | 0.79(0.55-1.12) | 0.84(0.58-1.23) | 0.81(0.58-1.13) | 1.19(0.80-1.77) | 0.76(0.47-1.25) | 0.86(0.63-1.18) | 0.67(0.40-1.11) | 0.71(0.50-1.03) |

**Supplementary Table 9.** Association between social class and changes in financial situation during the March-July 2020 lockdown (adjusted for ethnicity, age at time of questionnaire, home ownership, maternal and partner education, parity, maternal age and maternal marital status). N=2557

|                                                   | <b>NS-SEC social class at age 23 years</b>                            |                                 |                                       |                                              |
|---------------------------------------------------|-----------------------------------------------------------------------|---------------------------------|---------------------------------------|----------------------------------------------|
|                                                   | <b>Higher managerial, administrative and professional occupations</b> | <b>Intermediate occupations</b> | <b>Routine and manual occupations</b> | <b>Never worked and long-term unemployed</b> |
|                                                   | <b>N=1126</b>                                                         | <b>N=616</b>                    | <b>N=579</b>                          | <b>N=236</b>                                 |
| <b>Change in employment</b>                       |                                                                       |                                 |                                       |                                              |
| Employed with the same or more hours              | ref                                                                   | ref                             | ref                                   | ref                                          |
| Reduced hours                                     | ref                                                                   | 0.87(0.57-1.34)                 | 1.45(0.96-2.18)                       | 1.54(0.87-2.75)                              |
| Furlough/paid or unpaid leave                     | ref                                                                   | 1.39(1.02-1.91)                 | 2.38(1.73-3.26)                       | 2.10(1.30-3.38)                              |
| Stopped working during pandemic                   | ref                                                                   | 0.98(0.58-1.67)                 | 2.68(1.63-4.42)                       | 2.83(1.45-5.50)                              |
| Not working pre-pandemic                          | ref                                                                   | 1.21(0.72-2.05)                 | 2.11(1.27-3.51)                       | 5.38(3.05-9.49)                              |
| <b>Financial situation</b>                        |                                                                       |                                 |                                       |                                              |
| Worse off                                         | ref                                                                   | 0.98(0.73-1.31)                 | 1.45(1.08-1.96)                       | 1.45(0.95-2.23)                              |
| No change                                         | ref                                                                   | ref                             | ref                                   | ref                                          |
| Better off                                        | ref                                                                   | 0.99(0.76-1.29)                 | 0.81(0.61-1.08)                       | 0.81(0.53-1.23)                              |
| <b>Claimed benefits since pandemic</b>            | ref                                                                   | 0.95(0.65-1.41)                 | 1.45(0.99-2.10)                       | 2.06(1.24-3.43)                              |
| <b>Used rent/mortgage deferral since pandemic</b> | ref                                                                   | 1.28(0.83-1.97)                 | 1.15(0.72-1.85)                       | 0.73(0.30-1.79)                              |



**Supplementary Table 10.** Association between Adverse Childhood Experiences score and changes in financial situation during the March-July 2020 lockdown (adjusted for ethnicity, age at time of questionnaire, home ownership, maternal and partner education, parity, maternal age and maternal marital status). N=2707

|                                                   | <b>Number of Adverse Childhood Experiences between 0-16 years</b> |                 |                 |                  |
|---------------------------------------------------|-------------------------------------------------------------------|-----------------|-----------------|------------------|
|                                                   | <b>0</b>                                                          | <b>1</b>        | <b>2-3</b>      | <b>4 or more</b> |
|                                                   | <b>N=504</b>                                                      | <b>N=679</b>    | <b>N=980</b>    | <b>N=544</b>     |
| <b>Change in employment</b>                       |                                                                   |                 |                 |                  |
| Employed with the same or more hours              | ref                                                               | ref             | ref             | ref              |
| Reduced hours                                     | ref                                                               | 0.80(0.50-1.27) | 0.95(0.62-1.45) | 0.83(0.49-1.38)  |
| Furlough/paid or unpaid leave                     | ref                                                               | 0.96(0.66-1.41) | 1.28(0.90-1.81) | 1.51(1.02-2.24)  |
| Stopped working during pandemic                   | ref                                                               | 1.00(0.57-1.77) | 1.28(0.75-2.18) | 1.37(0.68-2.78)  |
| Not working pre-pandemic                          | ref                                                               | 1.06(0.61-1.84) | 1.16(0.68-1.98) | 1.66(0.91-3.01)  |
| <b>Financial situation</b>                        |                                                                   |                 |                 |                  |
| Worse off                                         | ref                                                               | 0.98(0.69-1.39) | 1.26(0.92-1.72) | 1.45(0.98-2.14)  |
| No change                                         | ref                                                               | ref             | ref             | ref              |
| Better off                                        | ref                                                               | 0.89(0.67-1.19) | 0.95(0.71-1.26) | 0.93(0.66-1.31)  |
| <b>Claimed benefits since pandemic</b>            | ref                                                               | 1.37(0.90-2.08) | 1.13(0.75-1.69) | 1.32(0.81-2.15)  |
| <b>Used rent/mortgage deferral since pandemic</b> | ref                                                               | 0.72(0.41-1.28) | 1.10(0.67-1.82) | 1.19(0.64-2.22)  |

**Supplementary Table 11.** Association between individual Adverse Childhood Experiences and changes in financial situation during the March-July 2020 lockdown (unadjusted). N=2707

|                                      | Adverse Childhood Experience |                 |                 |                   |                 |                          |                          |                                    |                              |                     |
|--------------------------------------|------------------------------|-----------------|-----------------|-------------------|-----------------|--------------------------|--------------------------|------------------------------------|------------------------------|---------------------|
|                                      | Physical abuse               | Sexual abuse    | Emotional abuse | Emotional neglect | Bullying        | Violence between parents | Parental substance abuse | Parental mental illness or suicide | Parental criminal conviction | Parental separation |
|                                      | N=622                        | N=163           | N=659           | N=529             | N=646           | N=604                    | N=330                    | N=1183                             | N=280                        | N=780               |
| <b>Change in employment</b>          |                              |                 |                 |                   |                 |                          |                          |                                    |                              |                     |
| Employed with the same or more hours | ref                          | ref             | ref             | ref               | ref             | ref                      | ref                      | ref                                | ref                          | ref                 |
| Reduced hours                        | 1.02(0.70-1.48)              | 1.27(0.69-2.32) | 1.03(0.71-1.50) | 1.41(0.98-2.03)   | 1.15(0.79-1.67) | 0.74(0.47-1.15)          | 1.52(0.95-2.42)          | 0.87(0.64-1.18)                    | 0.77(0.41-1.46)              | 1.08(0.75-1.54)     |
| Furlough/paid or unpaid leave        | 1.30(0.99-1.72)              | 1.61(1.02-2.55) | 1.29(0.99-1.69) | 1.44(1.08-1.92)   | 1.29(0.99-1.68) | 1.41(1.06-1.89)          | 1.39(0.95-2.04)          | 1.09(0.87-1.37)                    | 1.20(0.78-1.83)              | 1.48(1.16-1.90)     |
| Stopped working during pandemic      | 2.15(1.41-3.27)              | 0.97(0.41-2.32) | 1.13(0.70-1.81) | 0.95(0.55-1.63)   | 1.19(0.79-1.81) | 0.84(0.47-1.51)          | 1.87(1.05-3.33)          | 1.02(0.70-1.46)                    | 1.01(0.50-2.02)              | 0.84(0.52-1.37)     |
| Not working pre-pandemic             | 1.43(0.96-2.13)              | 1.23(0.61-2.48) | 1.19(0.78-1.82) | 1.75(1.16-2.66)   | 1.31(0.90-1.92) | 1.27(0.81-1.99)          | 1.15(0.62-2.13)          | 1.28(0.92-1.80)                    | 0.85(0.42-1.72)              | 1.53(1.05-2.23)     |

|                                                   |                 |                 |                 |                 |                 |                 |                 |                 |                 |                 |
|---------------------------------------------------|-----------------|-----------------|-----------------|-----------------|-----------------|-----------------|-----------------|-----------------|-----------------|-----------------|
| <b>Financial situation</b>                        |                 |                 |                 |                 |                 |                 |                 |                 |                 |                 |
| Worse off                                         | 1.35(1.03-1.77) | 1.41(0.88-2.25) | 1.05(0.79-1.38) | 0.97(0.74-1.28) | 1.12(0.86-1.46) | 1.04(0.78-1.37) | 1.45(1.02-2.08) | 1.20(0.96-1.51) | 1.32(0.88-1.99) | 1.18(0.91-1.52) |
| No change                                         | ref             | ref             | ref             | ref             | ref             | ref             | ref             | ref             | ref             | ref             |
| Better off                                        | 0.91(0.71-1.16) | 1.20(0.77-1.85) | 1.08(0.84-1.38) | 0.81(0.62-1.05) | 0.93(0.74-1.18) | 0.86(0.67-1.10) | 1.14(0.81-1.62) | 1.01(0.82-1.24) | 1.28(0.86-1.92) | 0.89(0.70-1.13) |
| <b>Claimed benefits since pandemic</b>            | 1.15(0.85-1.56) | 1.21(0.70-2.08) | 1.09(0.79-1.50) | 0.95(0.67-1.35) | 1.11(0.80-1.52) | 0.93(0.65-1.35) | 1.35(0.89-2.05) | 0.98(0.75-1.28) | 1.10(0.67-1.81) | 0.99(0.73-1.33) |
| <b>Used rent/mortgage deferral since pandemic</b> | 1.16(0.77-1.75) | 1.13(0.52-2.45) | 0.90(0.56-1.44) | 1.02(0.62-1.70) | 1.23(0.83-1.81) | 1.47(0.96-2.24) | 1.16(0.65-2.08) | 1.23(0.86-1.76) | 1.23(0.66-2.29) | 1.43(0.96-2.13) |

**Supplementary Table 12.** Association between individual Adverse Childhood Experiences and changes in financial situation during the March-July 2020 lockdown (adjusted for ethnicity, age at time of questionnaire, home ownership, maternal and partner education, parity, maternal age and maternal marital status). N=2707

|                                      | Adverse Childhood Experience |                 |                 |                   |                 |                          |                          |                                    |                              |                     |
|--------------------------------------|------------------------------|-----------------|-----------------|-------------------|-----------------|--------------------------|--------------------------|------------------------------------|------------------------------|---------------------|
|                                      | Physical abuse               | Sexual abuse    | Emotional abuse | Emotional neglect | Bullying        | Violence between parents | Parental substance abuse | Parental mental illness or suicide | Parental criminal conviction | Parental separation |
|                                      | N=622                        | N=163           | N=659           | N=529             | N=646           | N=604                    | N=330                    | N=1183                             | N=280                        | N=780               |
| <b>Change in employment</b>          |                              |                 |                 |                   |                 |                          |                          |                                    |                              |                     |
| Employed with the same or more hours | ref                          | ref             | ref             | ref               | ref             | ref                      | ref                      | ref                                | ref                          | ref                 |
| Reduced hours                        | 0.99(0.67-1.45)              | 1.12(0.6-2.10)  | 0.96(0.65-1.42) | 1.36(0.93-1.99)   | 1.11(0.76-1.63) | 0.68(0.42-1.09)          | 1.42(0.84-2.39)          | 0.81(0.59-1.11)                    | 0.71(0.37-1.37)              | 0.96(0.65-1.42)     |
| Furlough/paid or unpaid leave        | 1.19(0.89-1.60)              | 1.43(0.89-2.32) | 1.21(0.91-1.60) | 1.34(0.99-1.80)   | 1.24(0.94-1.62) | 1.25(0.91-1.72)          | 1.04(0.67-1.60)          | 0.97(0.77-1.23)                    | 1.01(0.64-1.61)              | 1.19(0.90-1.58)     |
| Stopped working during pandemic      | 2.32(1.49-3.60)              | 0.90(0.36-2.22) | 1.08(0.66-1.76) | 0.98(0.56-1.73)   | 1.21(0.79-1.87) | 0.82(0.44-1.54)          | 1.82(0.94-3.50)          | 1.00(0.69-1.46)                    | 1.03(0.48-2.20)              | 0.78(0.45-1.33)     |
| Not working                          | 1.28(0.83-1.96)              | 1.03(0.49-2.17) | 1.06(0.68-1.66) | 1.67(1.08-2.57)   | 1.19(0.79-1.80) | 1.18(0.72-1.91)          | 0.87(0.43-1.79)          | 1.14(0.80-1.62)                    | 0.66(0.30-1.43)              | 1.29(0.85-1.96)     |

|                                                   |                 |                 |                 |                 |                 |                 |                 |                 |                 |                 |
|---------------------------------------------------|-----------------|-----------------|-----------------|-----------------|-----------------|-----------------|-----------------|-----------------|-----------------|-----------------|
| pre-pandemic                                      |                 |                 |                 |                 |                 |                 |                 |                 |                 |                 |
| <b>Financial situation</b>                        |                 |                 |                 |                 |                 |                 |                 |                 |                 |                 |
| Worse off                                         | 1.35(1.01-1.79) | 1.46(0.91-2.36) | 1.04(0.78-1.40) | 0.98(0.74-1.30) | 1.13(0.86-1.48) | 1.03(0.77-1.39) | 1.39(0.94-2.07) | 1.19(0.94-1.49) | 1.35(0.88-2.06) | 1.18(0.89-1.57) |
| No change                                         | ref             | ref             | ref             | ref             | ref             | ref             | ref             | ref             | ref             | ref             |
| Better off                                        | 0.93(0.72-1.21) | 1.27(0.80-2.02) | 1.12(0.86-1.45) | 0.88(0.66-1.15) | 0.96(0.76-1.23) | 0.87(0.67-1.14) | 1.18(0.80-1.73) | 1.06(0.86-1.31) | 1.33(0.87-2.03) | 0.99(0.76-1.28) |
| <b>Claimed benefits since pandemic</b>            | 1.11(0.81-1.53) | 1.17(0.67-2.05) | 1.05(0.75-1.47) | 0.94(0.66-1.35) | 1.10(0.79-1.53) | 0.89(0.61-1.31) | 1.32(0.82-2.13) | 0.98(0.74-1.29) | 1.09(0.64-1.83) | 0.97(0.70-1.35) |
| <b>Used rent/mortgage deferral since pandemic</b> | 1.18(0.77-1.81) | 1.06(0.46-2.43) | 0.86(0.54-1.39) | 0.94(0.55-1.62) | 1.17(0.78-1.76) | 1.42(0.90-2.24) | 1.04(0.53-2.06) | 1.19(0.81-1.74) | 1.18(0.60-2.34) | 1.28(0.82-2.01) |
